# Supplementary material for: Per1/Per2 knockout Affects Spleen Immune Function in Elderly Mice via Inducing Spleen Lymphocyte Ferroptosis
Source: MDPI journal article supplement (doi:10.3390/ijms232112962), 2022-10-26
Supplement: s1 [file s1]

# ***Per1/Per2* Knockout Affects Spleen Immune Function in Elderly Mice via Inducing Spleen Lymphocyte Ferroptosis**

Ruyi He <sup>†</sup>, Shijie Zhang <sup>†</sup>, Jiale Yu, Xiaojie Yu, Jian Wang, Yi Qiu, Wenting Zhou, Fangyi Wang, Feng Ren and Zhiguo Liu <sup>\*</sup>

School of Life Science and Technology, Wuhan Polytechnic University, Wuhan 430024, China

<sup>\*</sup> Correspondence: zhiguoliu@whpu.edu.cn

<sup>†</sup> These authors contributed equally to this work.

This PDF file includes:

Supplementary Tables S1–S3

Supplementary Figures S1–S5

**Table S1.** Changes in the ratio of DKO/ WT-related differential mRNAs  
in ferroptosis pathways

| <b>Gene<br/>Symbol</b> | <b>Description</b>                                  | <b>logFC</b> | <b>P.Value</b> | <b>change</b> |
|------------------------|-----------------------------------------------------|--------------|----------------|---------------|
| <i>Atr</i>             | Ataxia telangiectasia and Rad3 related              | 0.772927     | 2.94E-06       | UP            |
| <i>Atm</i>             | Ataxia telangiectasia-mutated gene                  | 0.392001     | 0.006306       | UP            |
| <i>Prkdc</i>           | Protein Kinase, DNA-Activated, Catalytic<br>Subunit | 0.473959     | 0.000732       | UP            |
| <i>Chek1</i>           | Checkpoint Kinase 1                                 | 1.801378     | 4.35E-16       | UP            |
| <i>Chek2</i>           | Checkpoint Kinase 2                                 | 0.976704     | 1.37E-09       | UP            |
| <i>Apex2</i>           | Apurinic/Apyrimidinic<br>Endodeoxyribonuclease 2    | 0.333752     | 0.030491       | UP            |
| <i>Msh6</i>            | MutS Homolog 6                                      | 0.635101     | 3.82E-06       | UP            |
| <i>Pms2</i>            | PMS1 Homolog 2, Mismatch Repair<br>System Component | 0.440204     | 0.00027        | UP            |
| <i>Dnmt1</i>           | DNA Methyltransferase 1                             | 0.432902     | 0.015051       | UP            |
| <i>H2afx</i>           | H2A histone family, member X                        | 0.805355     | 0.000103       | UP            |
| <i>Msh5</i>            | MutS Homolog 5                                      | 0.417796     | 0.030714       | UP            |
| <i>Msh3</i>            | MutS Homolog 3                                      | 0.842693     | 9.58E-10       | UP            |
| <i>Bcl6</i>            | BCL6 Transcription Repressor                        | 0.036382     | 0.794541       | NOT           |
| <i>Gadd45b</i>         | Growth Arrest And DNA Damage Inducible<br>Beta      | -0.37955     | 0.008765       | DOWN          |
| <i>Sod3</i>            | Superoxide Dismutase 3                              | -0.73053     | 8.73E-05       | DOWN          |
| <i>Smad4</i>           | SMAD Family Member 4                                | -0.2693      | 0.034612       | DOWN          |
| <i>Smad3</i>           | SMAD Family Member 3                                | -0.28746     | 0.019942       | DOWN          |
| <i>Foxo1</i>           | Forkhead Box O1                                     | -0.4173      | 0.012844       | DOWN          |
| <i>Klf2</i>            | Kruppel Like Factor 2                               | -0.4301      | 0.013976       | DOWN          |
| <i>Sirt1</i>           | Sirtuin 1                                           | 0.89069      | 7.00E-08       | UP            |
| <i>Foxo4</i>           | Forkhead Box O4                                     | 0.337196     | 0.007948       | UP            |
| <i>Foxo3</i>           | Forkhead Box O3                                     | 0.788951     | 0.000103       | UP            |
| <i>Cd36</i>            | CD36 Molecule                                       | 0.844657     | 2.27E-06       | UP            |
| <i>Acs14</i>           | Acyl-CoA Synthetase Long Chain Family<br>Member 4   | 0.500407     | 0.002451       | UP            |
| <i>Lox</i>             | Lysyl Oxidase                                       | 0.569453     | 0.039129       | UP            |
| <i>Lpcat3</i>          | Lysophosphatidylcholine Acyltransferase 3           | 0.887262     | 3.15E-07       | UP            |
| <i>Steap3</i>          | STEAP3 Metalloreductase                             | 1.077301     | 2.53E-06       | UP            |
| <i>Slc11a2</i>         | Solute Carrier Family 11 Member 2                   | 0.763997     | 2.73E-06       | UP            |
| <i>Ireb2</i>           | Iron Responsive Element Binding Protein 2           | 0.741732     | 4.40E-06       | UP            |
| <i>Tulp4</i>           | TUB Like Protein 4                                  | -0.25114     | 0.032295       | DOWN          |
| <i>Slc39a8</i>         | Solute Carrier Family 39 Member 8                   | 1.586668     | 2.93E-09       | UP            |
| <i>Tfrc</i>            | Transferrin Receptor                                | 2.454485     | 9.12E-10       | UP            |
| <i>Prnp</i>            | Prion Protein                                       | 0.472854     | 0.005242       | UP            |
| <i>Ftl1</i>            | Fms related tyrosine kinase 1                       | -0.2649      | 0.036538       | DOWN          |
| <i>Rorc</i>            | RAR Related Orphan Receptor C                       | -0.92871     | 8.70E-05       | DOWN          |

|                 |                                                                  |          |           |      |
|-----------------|------------------------------------------------------------------|----------|-----------|------|
| <i>Srebf2</i>   | Sterol Regulatory Element Binding<br>Transcription Factor 2      | -0.43092 | 0.015567  | DOWN |
| <i>Gpx4</i>     | Glutathione Peroxidase 4                                         | 0.132068 | 0.487136  | NOT  |
| <i>Sepsecs</i>  | Sep (O-Phosphoserine) TRNA:Sec<br>(Selenocysteine) TRNA Synthase | 0.407574 | 0.044122  | UP   |
| <i>Secisbp2</i> | SECIS Binding Protein 2                                          | 0.042339 | 0.730102  | NOT  |
| <i>Trit1</i>    | TRNA Isopentenyltransferase 1                                    | -0.17204 | 0.169288  | NOT  |
| <i>Hmgcr</i>    | 3-Hydroxy-3-Methylglutaryl-CoA<br>Reductase                      | 0.149581 | 0.212724  | NOT  |
| <i>Mvd</i>      | Mevalonate Diphosphate Decarboxylase                             | -0.31105 | 0.051668  | NOT  |
| <i>Sumo1</i>    | Small ubiquitin like modifier 1                                  | 0.451489 | 0.0005123 | UP   |
| <i>Sumo2</i>    | Small ubiquitin like modifier 2                                  | 0.478137 | 0.0070311 | UP   |
| <i>Ube2o</i>    | ubiquitin conjugating enzyme E2 O                                | 0.698306 | 0.0150987 | UP   |
| <i>Ube3a</i>    | Ubiquitin Protein Ligase E3A                                     | 0.671174 | 1.66E-05  | UP   |
| <i>Arntl</i>    | Aryl Hydrocarbon Receptor Nuclear<br>Translocator Like           | -0.51523 | 0.000585  | DOWN |
| <i>Sqstm1</i>   | Sequestosome 1                                                   | -0.34414 | 0.049441  | DOWN |
| <i>Egln2</i>    | Egl-9 Family Hypoxia Inducible Factor 2                          | -0.32685 | 0.005514  | DOWN |
| <i>Hif1a</i>    | Hypoxia Inducible Factor 1 Subunit Alpha                         | 0.414608 | 0.002703  | UP   |

---

**Table S2.** Antibodies used in this study

| Protein        | Manufacturer | LOT.NO     |
|----------------|--------------|------------|
| GPX4           | proteintech  | 67763-1-Ig |
| SLA            | Proteintech  | 11551-1-AP |
| SBP2           | Proteintech  | 12798-1-AP |
| IPT            | BIOSS        | bs-17134R  |
| HMGCR          | abcam        | ab174830   |
| MVD            | Proteintech  | 15331-1-AP |
| BMAL1          | Santa        | SC-373955  |
| SQSTM1         | Proteintech  | 18420-1-AP |
| EGLN2          | Affinity     | DF7918     |
| HIF1A          | Santa        | SC-13515   |
| $\beta$ -actin | Rabbit       | abcam      |

**Table S3.** qPCR primers used in this study

| Gene                            | Forward Primer (5-3)     | Reverse Primer (3-5)    |
|---------------------------------|--------------------------|-------------------------|
| <i><math>\beta</math>-actin</i> | CGTTGACATCCGTAAAGACC     | AACAGTCCGCCTAGAAGCAC    |
| <i>Rory</i>                     | TGCGACTGGAGGACCTTCTACG   | GTTGTTGGACGGGCTGAGGATG  |
| <i>Srebp2</i>                   | CACAAGTCTGGCGTTCTGAGGAAG | CCAGCTTCAGCACCATGTTCTCC |

SUPPLEMENTARY FIGURES

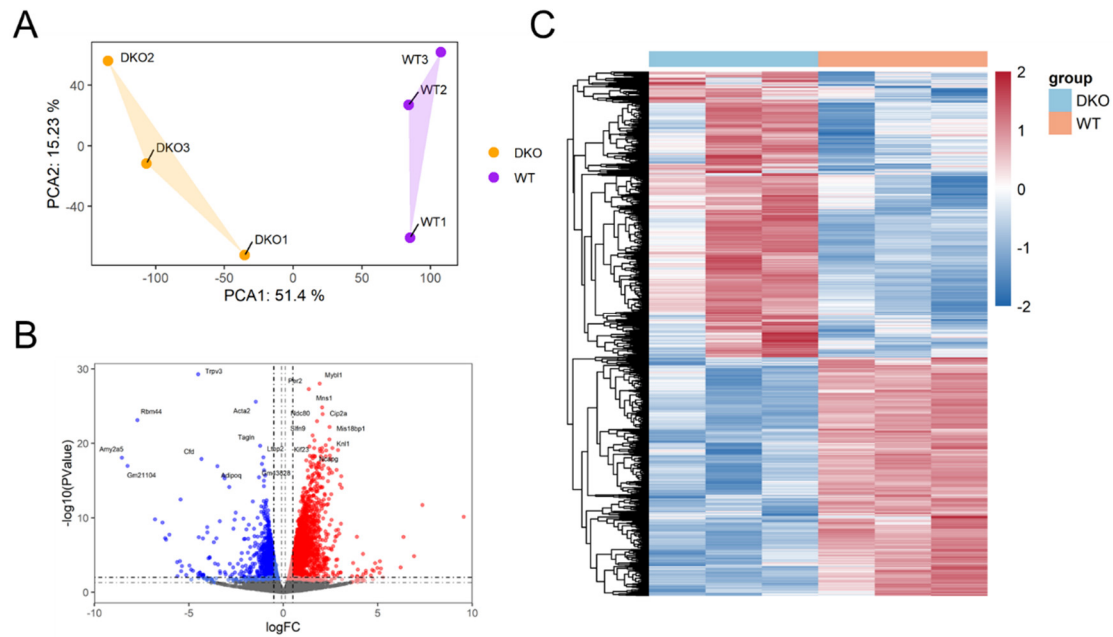

**Figure S1. Differentially expressed spleen RNA between 14-month-old DKO and WT mice ( $|\log_2 \text{fold change}| > 0.1$ ,  $p\text{-value} < 0.05$ ).** Compared with normal samples, 3583 mRNA were upregulated and 2290 mRNA were downregulated in DKO mice. (A) Principal component analysis (PCA) of DKO samples and WT samples; (B) Volcano map for differentially expressed mRNAs. Red stands for up-regulation, blue stands for down-regulations, and gray stands for intermediate in volcanoes. Each point represents a gene. (C) Heatmap for differentially expressed mRNAs. Red stands for DKO male mice, and blue stands for WT male mice.

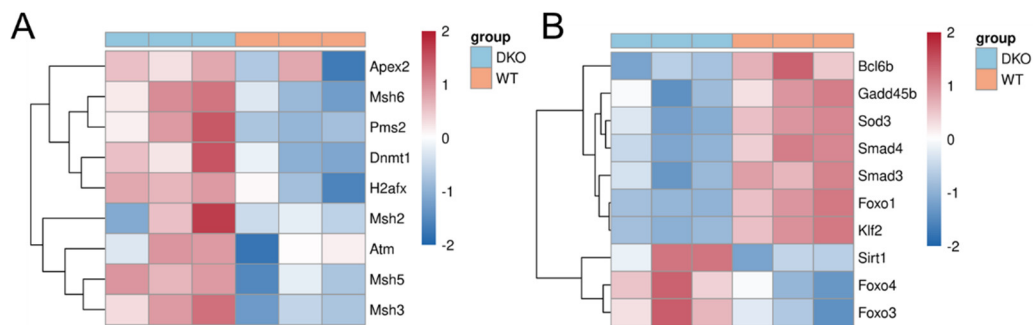

**Figure S2. Heatmap for DEMRNAs involved in (A) DNA repair pathways, (B) FoxO signaling pathway. Blue: DKO mice; Red: WT mice.**

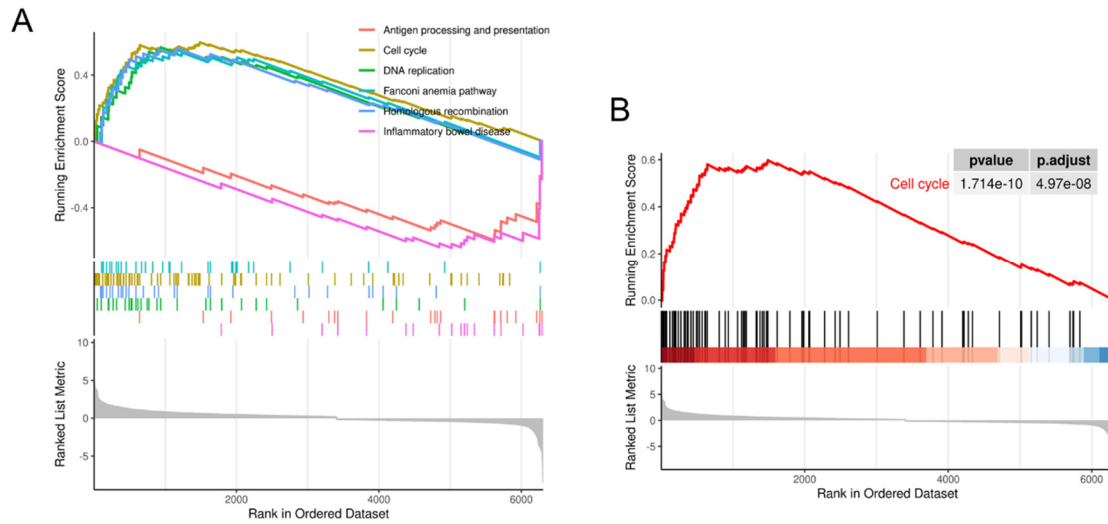

Figure S3. Gene set enrichment analysis (GSEA) for DEmRNAs

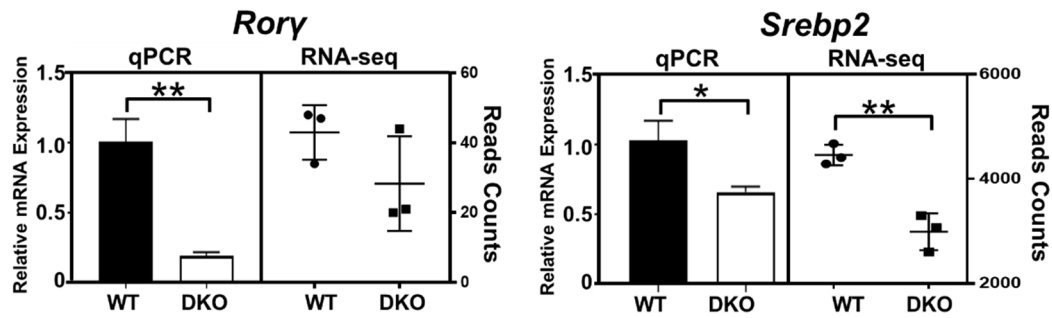

Figure S4. RT-qPCR results (left side of each image) and mRNA relative expression in Reads counts (right side of each image) of *Rory* and *Srebp2*. Data are presented as mean  $\pm$  SD,  $n = 3/\text{group}$ . \*  $p < 0.05$ , \*\*  $p < 0.01$ .

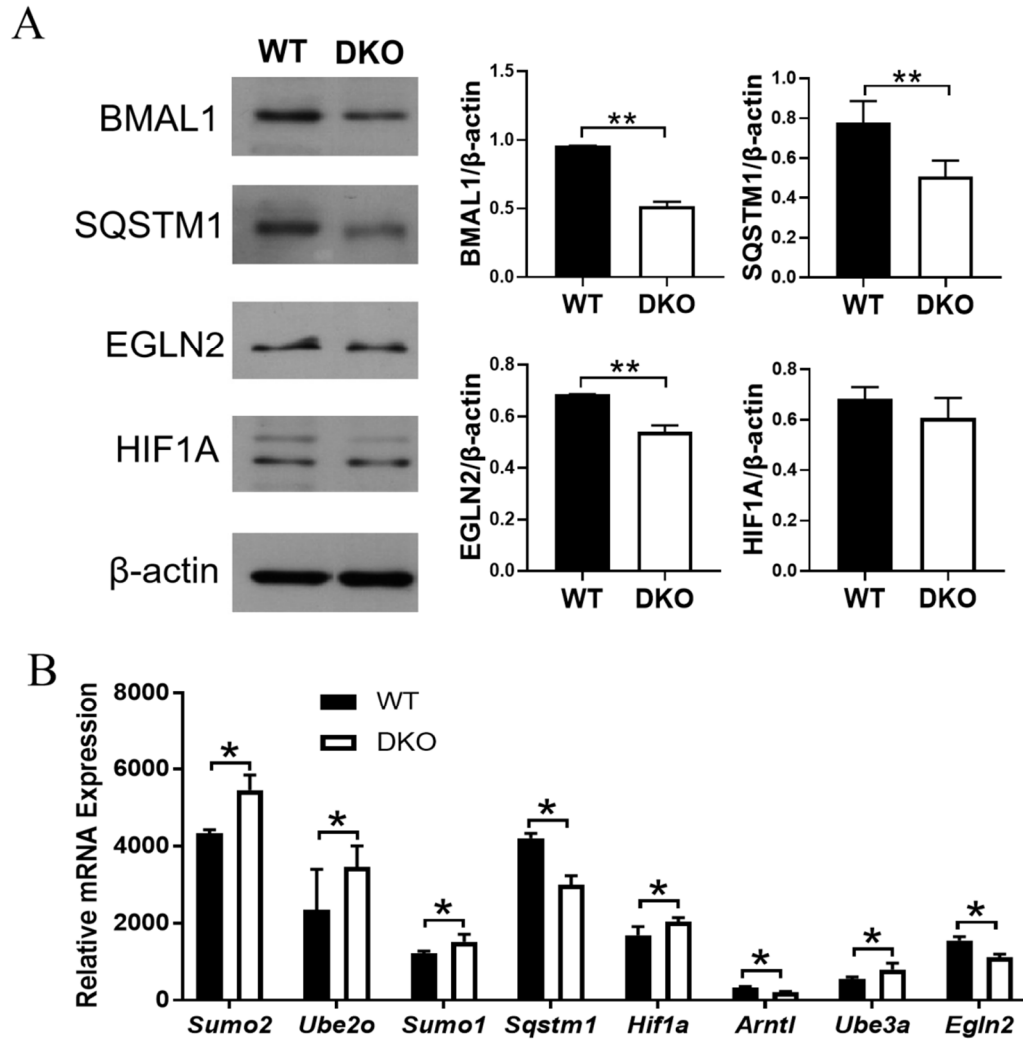

**Figure S5. Expression of selective autophagic degradation related genes.** (A) Western blot results of Bmal1, SQSTM1, EGLN2, and HIF1A. (B) Relative mRNA expression of *Sumo2*, *Ube2o*, *Sumo1*, *Sqstm1*, *Hif1a*, *Arntl*, *Ube3a*, *Egl2*. Data are presented as mean  $\pm$  SD, n = 2/group.\*  $p < 0.05$ , \*\*  $p < 0.01$ .
